# Supplementary material for: Phospholipid scramblase-1 regulates innate type 2 inflammation in mouse lungs via CRTH2-dependent mechanisms
Source: PubMed Central journal article supplement (PMC10378191; doi:10.1172/jci169583), 2023-08-01
Supplement: jci-133-169583-s122.pdf [file jci-133-169583-s122.pdf]

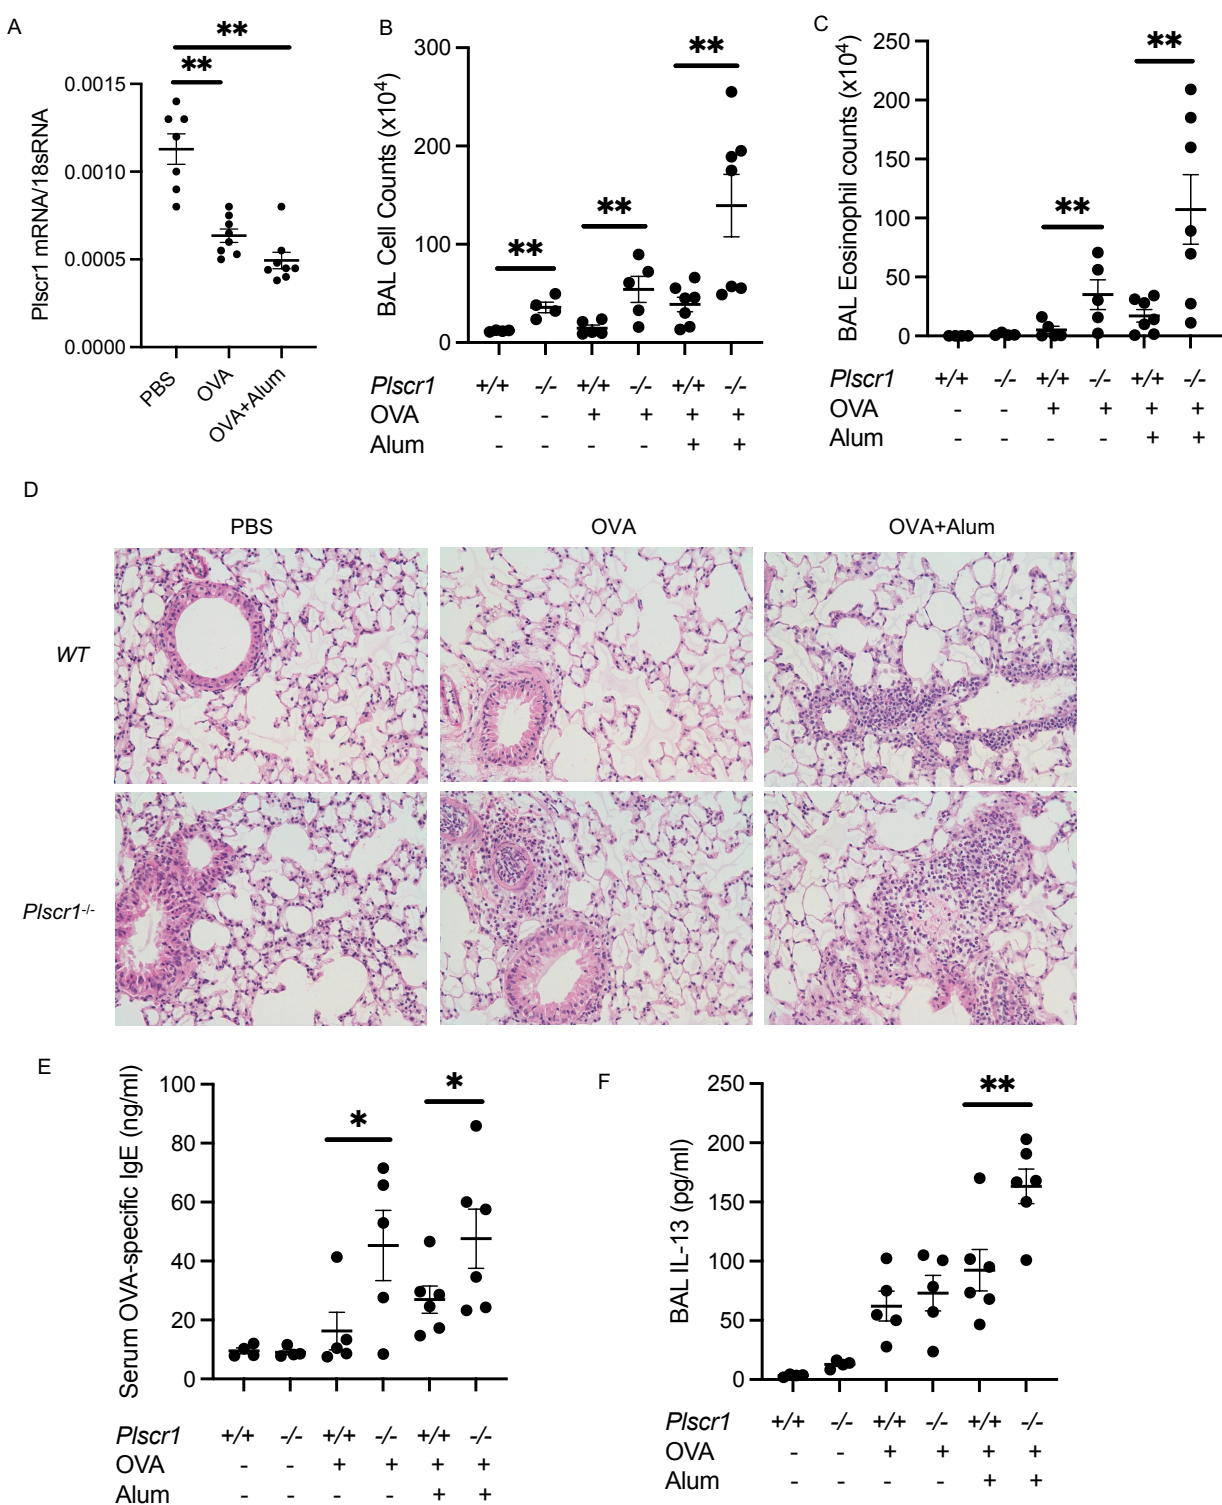

**Supplemental Fig 1. Null mutations of *Plscr1* significantly augments OVA-induced type 2 immune responses.** (A) *WT* mice were subjected to OVA sensitization and challenge, with or without alum as the conjugant, lung *Plscr1* mRNA expression was assessed by qRT-PCR. Values are mean  $\pm$  SEM with 7-9 mice in each group. Data was assessed with unpaired Student's t-test.  $**p \leq 0.01$ . (B and C) *WT* and *Plscr1*<sup>-/-</sup> mice were subjected to OVA sensitization and challenge, with or without alum as the conjugant. BAL total cell and eosinophil counts were assessed by Diff-Quik staining. (D) H&E staining of *WT* and *Plscr1*<sup>-/-</sup> mice with and without OVA administration. (E) Serum OVA-specific IgE levels were measured by ELISA. (F) BAL IL-13 levels were quantitated by ELISA. Values are mean  $\pm$  SEM with 4-7 mice in each group. Comparisons between groups were conducted by two-way ANOVA with Bonferroni's post test.  $*p \leq 0.05$ ,  $**p \leq 0.01$ .

A

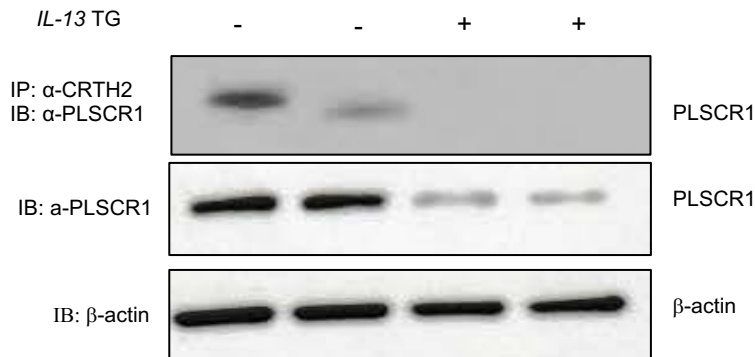

B

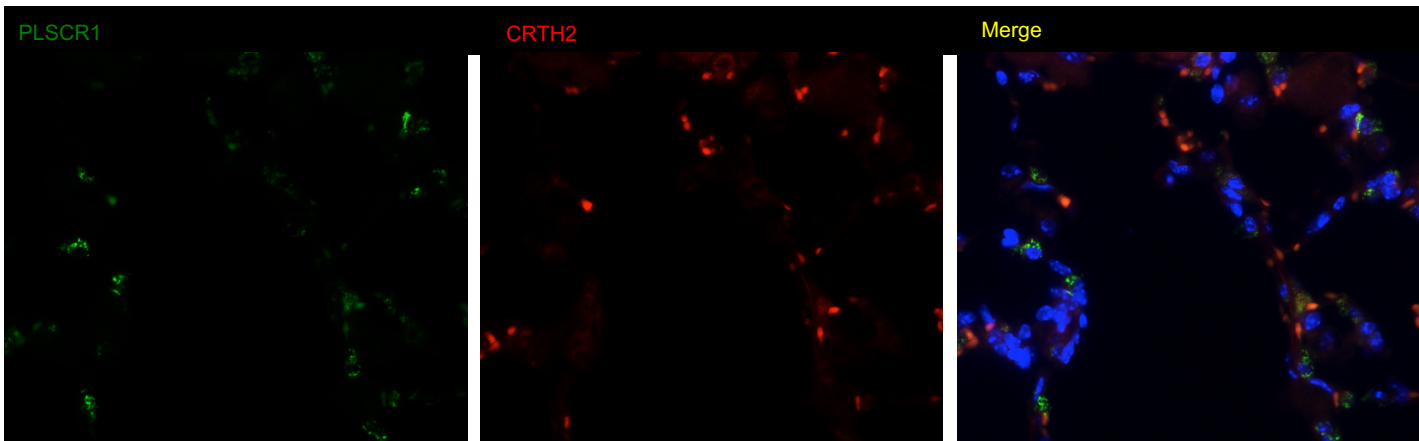

**Supplemental Fig 2. The binding between PLSCR1 and CRTH2 in *IL-13* Tg lungs.** (A) *WT* and *IL-13* Tg mouse lung protein lysates were co-immunoprecipitated (Co-IP) with  $\alpha$ -CRTH2 antibody and immunoblot (IB) with  $\alpha$ -PLSCR1. Individual IBs with  $\alpha$ -PLSCR1 and actin were also included. (B) Lungs from HDM-treated mice were sectioned, CRTH2 was labeled with red fluorescence (alexafuor 594) and Plscr1 was labeled with green fluorescence (alexafuor 488). Co-localization of CRTH2 and Plscr1 is indicated by arrows. Nuclei are stained with DAPI (blue). Images are representative of 3 mice.

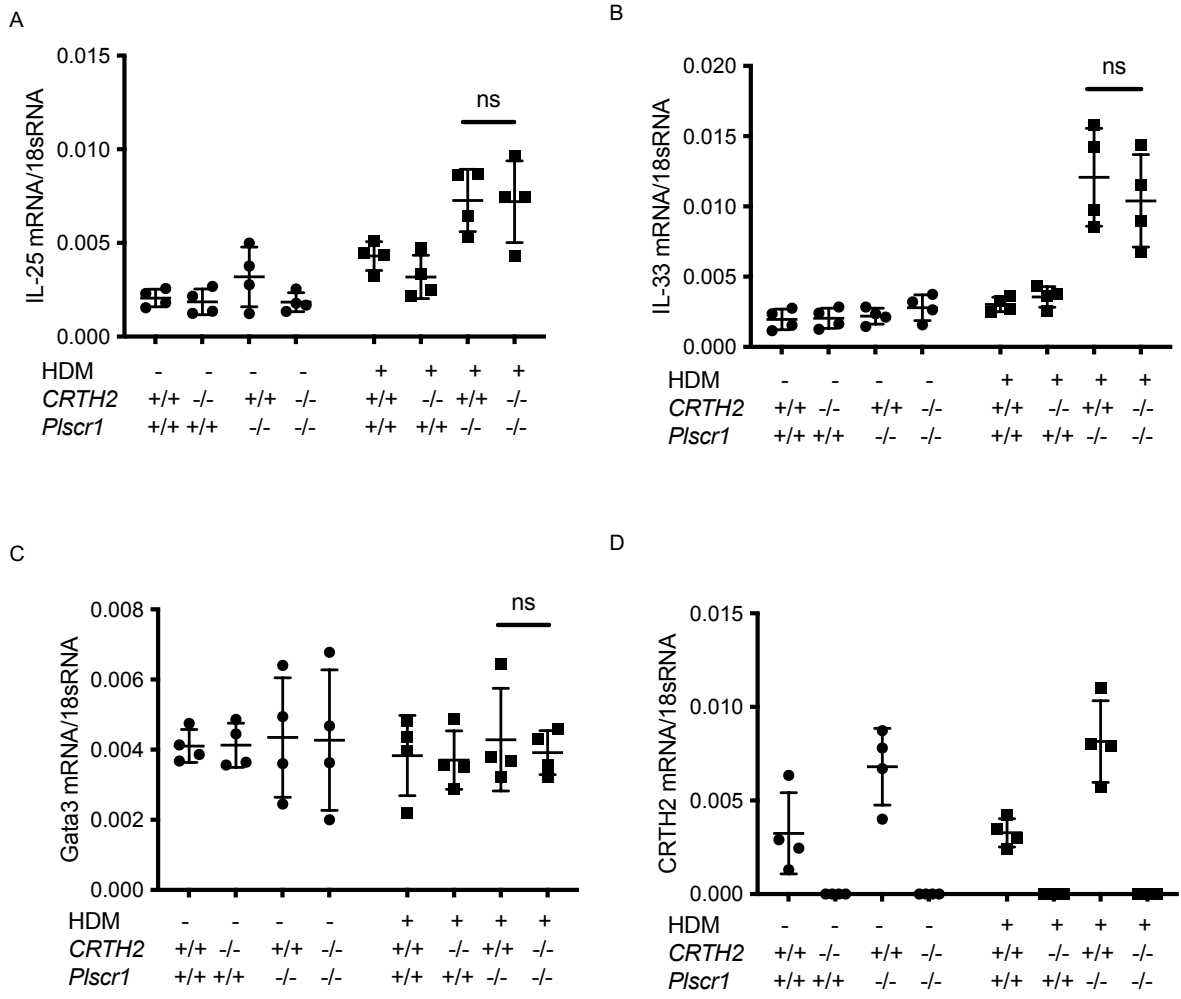

**Supplemental Fig 3. IL-25 and IL-33 secretion, and Gata3 expression were not affected by the absence of CRTH2.** WT, *CRTH2*<sup>-/-</sup>, *Plscr1*<sup>-/-</sup>, and *CRTH2*<sup>-/-</sup>*Plscr1*<sup>-/-</sup> mice were subjected to HDM administration. In (A) and (B), whole lung mRNA was extracted and IL-25 and IL-33 mRNA levels were assessed by RT-PCR. In (C) and (D), ILC2s were sorted and mRNA was extracted from ILC2s, and Gata3 and CRTH2 mRNA were assessed by RT-PCR. Values are mean± SEM with a minimum of 4 mice in HDM group. Comparisons between groups were conducted by two-way ANOVA with Bonferroni's post test. NS, not significant.

A

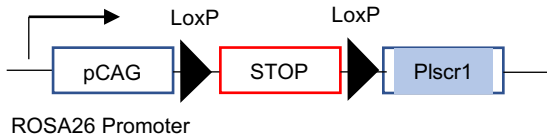

Rosa26 locus targeted Plscr1 conditional knock-in mice (*Rosa26-loxP-STOP-LoxP-Plscr1*; *Rosa-Plscr1<sup>LSL/LSL</sup>*)

B

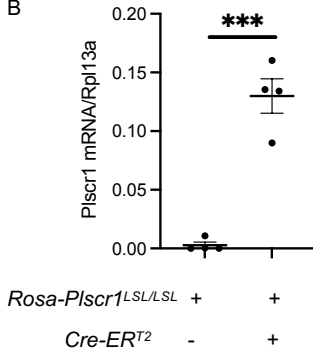

C

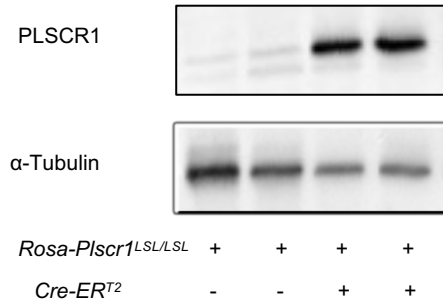

D

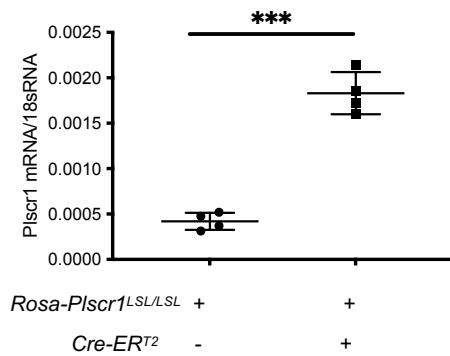

E

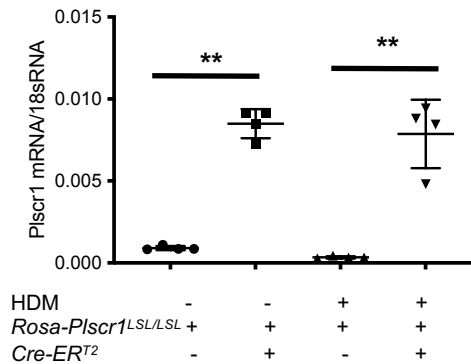

**Supplemental Fig 4. Generation of conditional Rosa-Plscr1 transgenic knock-in mouse model.** (A) Rosa26 locus targeted PLSCR1 conditional knock-in (KI) transgenic mice (*Rosa26-loxP-STOP-LoxP-Plscr1 Tg*; *Rosa-Plscr1<sup>LSL/LSL</sup>*). (B) *Rosa-Plscr1<sup>LSL/LSL</sup>* mice were crossed with *Cre-ERT2* mice, and were subjected to TAM injection to induce PLSCR1 expression, and PLSCR1 mRNA overexpression was assessed by qRT-PCR. (C) PLSCR1 protein level was evaluated by Western Immunoblot (IB) analysis. (D) *Plscr1* mRNA expression was assessed by qRT-PCR in sorted ILC2 cell population. (E) WT and *Rosa-Plscr1<sup>LSL/LSL</sup>;Cre-ERT2* mice were subjected to TAM injection to induce PLSCR1 expression, challenged with or without HDM, and mRNA expression was assessed by qRT-PCR in whole lung RNA. Values are mean  $\pm$  SEM with a minimum of 4 mice in HDM group. Data was assessed with unpaired Student's t-test. Comparisons between groups were conducted by two-way ANOVA with Bonferroni's post test.
